# Supplementary material for: Effect of Germination and Illumination on Melatonin and Its Metabolites, Phenolic Content, and Antioxidant Activity in Mung Bean Sprouts
Source: MDPI journal article supplement (doi:10.3390/plants11212990), 2022-11-06
Supplement: s1 [file s1]

## Supplementary Material

### Effect of Germination and Illumination on Melatonin and Its Metabolites, Phenolic Content, and Antioxidant Activity in Mung Bean Sprouts

Pimolwan Siriparu <sup>1</sup>, Panyada Panyatip <sup>2</sup>, Thanawat Pota <sup>3</sup>, Juthamat Ratha <sup>3</sup>, Chawalit Yongram <sup>4</sup>, Tarapong Srisongkram <sup>5</sup>, Bunleu Sungthong <sup>6</sup> and Ploenthip Puthongking <sup>3,5,\*</sup>

<sup>1</sup> Master of Sciences Program in Pharmaceutical Chemistry and Natural Products, Faculty of Pharmaceutical Sciences, Khon Kaen University, Khon Kaen, 40002, Thailand

<sup>2</sup> Department of Pharmacognosy, Faculty of Pharmacy, Srinakharinwirot University, Nakhon Nayok, 26120, Thailand

<sup>3</sup> Melatonin Research Group, Khon Kaen University, Khon Kaen, 40002, Thailand

<sup>4</sup> Division of Cannabis Health Science, College of Allied Health Sciences, Suansunandha Rajabhat University, Samut Songkhram, 75000, Thailand

<sup>5</sup> Division of Pharmaceutical Chemistry, Faculty of Pharmaceutical Sciences, Khon Kaen University, Khon Kaen, 40002, Thailand

<sup>6</sup> Integrative Pharmaceuticals and Innovation of Pharmaceutical Technology Research Unit, Faculty of Pharmacy, Mahasarakham University, Maha Sarakham, 44150, Thailand

\* Correspondence: pploenthip@kku.ac.th

## 1. Validation parameters of serotonin, tryptophan, and melatonin

**Table S1.** Validation parameters of serotonin, tryptophan, and melatonin

| Parameters                 | Serotonin              | Tryptophan             | Melatonin              |
|----------------------------|------------------------|------------------------|------------------------|
| Linear equation            | $y = 5.5665x + 0.0313$ | $y = 0.9564x + 0.0138$ | $y = 3.5414x - 0.0406$ |
| Range ( $\mu\text{g/mL}$ ) | 0.05 - 4.00            | 0.05 - 4.00            | 0.05 - 4.00            |
| Coefficient of correlation | 0.9997                 | 0.9995                 | 0.9998                 |
| LOD ( $\mu\text{g/mL}$ )   | 0.0025                 | 0.01                   | 0.0025                 |
| LOQ ( $\mu\text{g/mL}$ )   | 0.05                   | 0.05                   | 0.05                   |

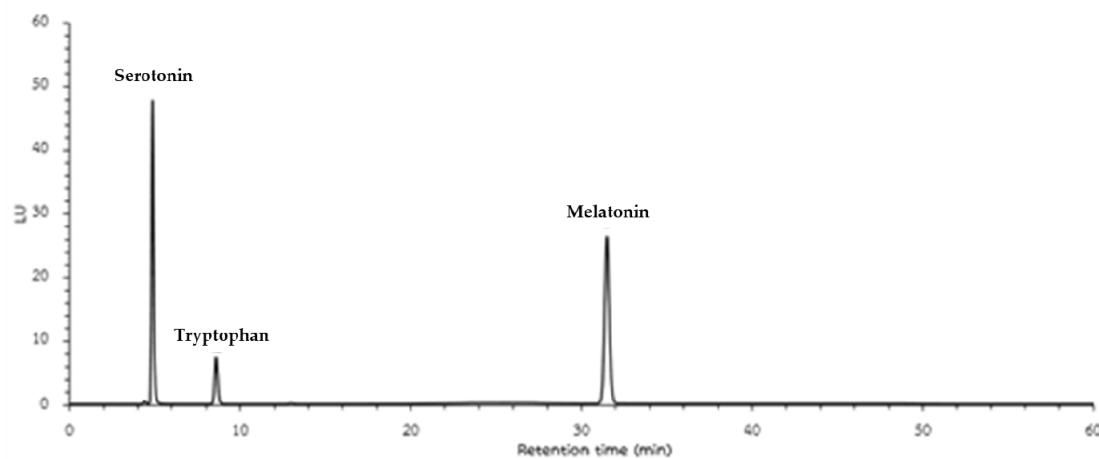

**Figure S1.** Chromatogram of standard tryptophan, serotonin, and melatonin at concentration of 4  $\mu\text{g/mL}$ .

2. Validation parameters of phenolic acids

Table S2. Validation parameters of standard phenolic acids

| Parameters                 | GA                   | PCCA                 | <i>p</i> -HO         | ChA                  | VA                   | SyA                  | <i>p</i> -CA        | RU                 | FA                   | SA                   | QU                 |
|----------------------------|----------------------|----------------------|----------------------|----------------------|----------------------|----------------------|---------------------|--------------------|----------------------|----------------------|--------------------|
| Linear equation            | y = 3647.4x + 1196.3 | y = 2398.4x + 1001.9 | y = 1657.9x + 775.62 | y = 3027.2x + 285.11 | y = 2837.3x + 1239.6 | y = 5111.5x + 2274.9 | y = 11200x + 3400.3 | y = 2886x + 1497.7 | y = 8965.9x + 2280.2 | y = 8027.5x + 1552.3 | y = 29567x - 28517 |
| Range (µg/mL)              | 0.25 – 5.00          | 0.25 – 5.00          | 0.25 – 5.00          | 0.25 – 5.00          | 0.25 – 5.00          | 0.25 – 5.00          | 0.25 – 5.00         | 0.25 – 5.00        | 0.25 – 5.00          | 0.25 – 5.00          | 0.25 – 5.00        |
| Coefficient of correlation | 0.9998               | 0.9997               | 0.9996               | 1.000                | 0.9997               | 0.9997               | 0.9998              | 0.9995             | 0.9998               | 0.9999               | 0.9982             |
| LOD (µg/mL)                | 0.005                | 0.025                | 0.025                | 0.025                | 0.010                | 0.010                | 0.005               | 0.025              | 0.010                | 0.005                | 0.001              |
| LOQ (µg/mL)                | 0.025                | 0.100                | 0.100                | 0.100                | 0.100                | 0.025                | 0.010               | 0.100              | 0.025                | 0.025                | 0.025              |

GA: gallic acid, PCCA: protocatechuic acid; *p*-HO: *p*-hydroxybenzoic acid; ChA: chlorogenic acid, VA: vanillic acid; SyA: syringic acid; *p*-CA: *p*-coumaric acid; RU: rutin; FA: ferulic acid; SA: sinapic acid; QU: quercetin.

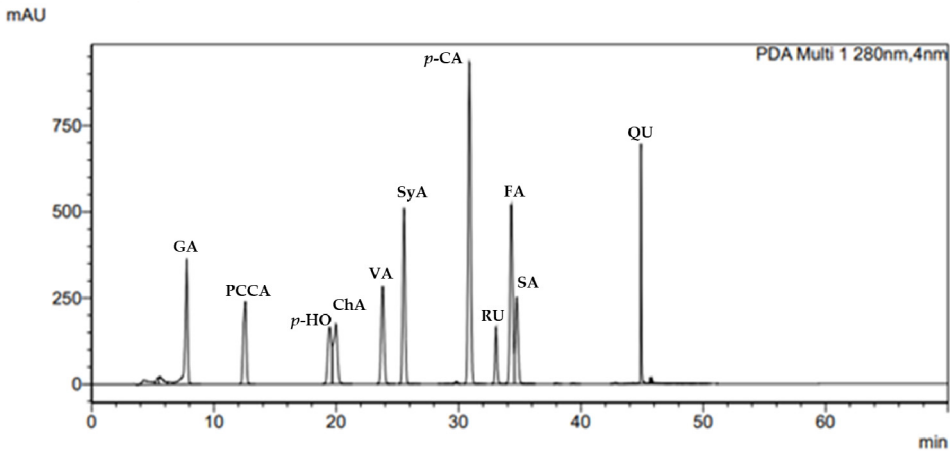

Figure S2. Chromatogram of standard phenolic acids at concentration of 5 µg/mL. GA: gallic acid, PCCA: protocatechuic acid; *p*-HO: *p*-hydroxybenzoic acid; ChA: chlorogenic acid, VA: vanillic acid; SyA: syringic acid; *p*-CA: *p*-coumaric acid; RU: rutin; FA: ferulic acid; SA: sinapic acid; QU: quercetin.
